# Supplementary material for: Highly efficient and flexible photodetector based on MoS2–ZnO heterostructures
Source: Royal Society of Chemistry journal article supplement (doi:10.1039/c9ra00578a), 2019-01-01
Supplement: c9ra00578a1.pdf [file c9ra00578a1.pdf]

## Supporting Information

### ARTICLE

## Highly efficient and flexible photodetector based on MoS<sub>2</sub>-ZnO heterostructures

Received 00th January 20xx,  
Accepted 00th January 20xx

DOI: 10.1039/x0xx00000x

[www.rsc.org/](http://www.rsc.org/)

Min-A Kang,<sup>a</sup> Seongjun Kim,<sup>a</sup> In-su Jeon,<sup>a</sup> Yi Rang Lim,<sup>a</sup> Chong-Yun Park,<sup>b</sup> Wooseok Song,<sup>a</sup> Sun Sook Lee,<sup>a</sup> Jongsun Lim,<sup>a</sup> Ki-Seok An<sup>a</sup> Sung Myung,<sup>a,\*</sup>

<sup>a</sup> Thin Film Materials Research Center, Korea Research Institute of Chemical Technology, Daejeon 305-600, Republic of Korea, E-mail: [msung@kRICT.re.kr](mailto:msung@kRICT.re.kr)

<sup>b</sup> Department of Physics, Sungkyunkwan University, Suwon, Gyeonggi-do 440-746, Republic of Korea

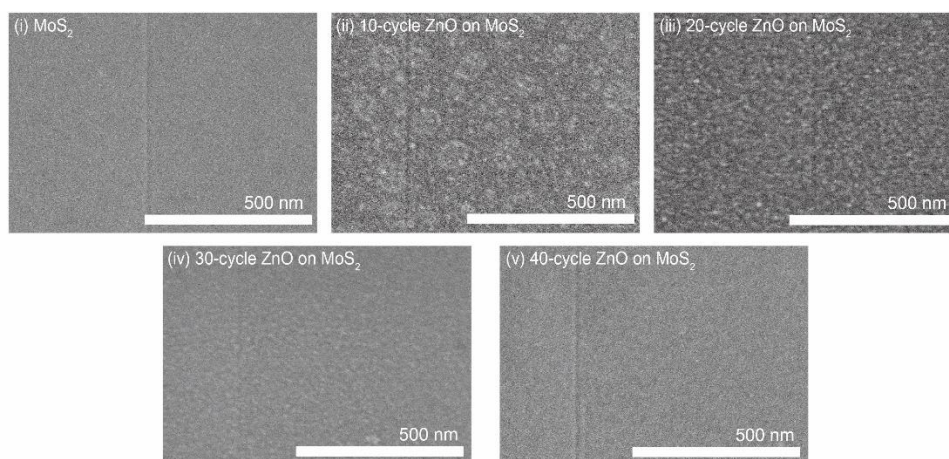

**Fig. S1.** High resolution FESEM images of MoS<sub>2</sub> nanosheets with ZnO nanopatches as a function of the process cycles (0, 10, 20, 30, and 40 cycles) during ALD process.

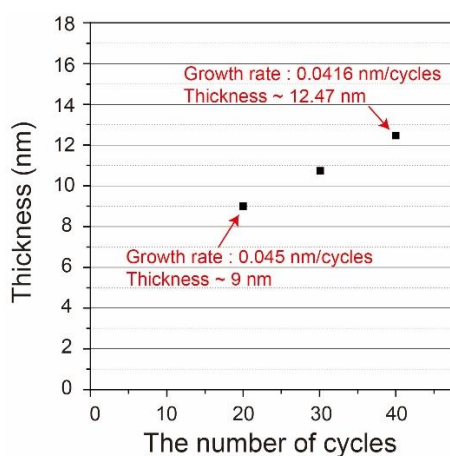

**Fig. S2.** XRR profile of as-deposited ZnO with regard to the number of ALD cycles.

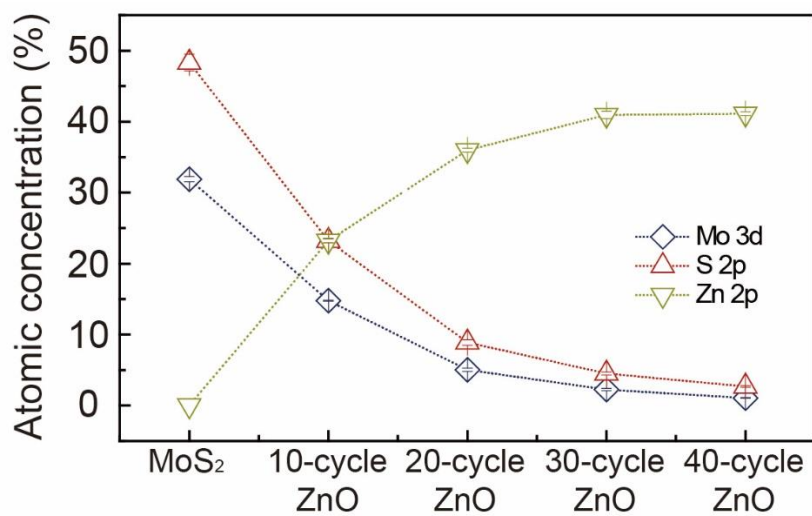

**Figure S3.** Atomic concentration of MoS<sub>2</sub>-ZnO hybrid structure depending on the number of ZnO cycles

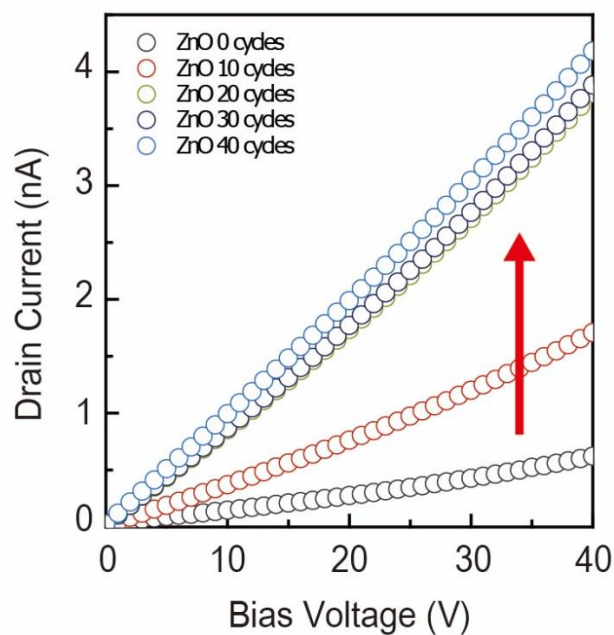

**Figure S4.** Output characteristics of MoS<sub>2</sub>-ZnO hybrid structure as a function of the number of ZnO cycles.

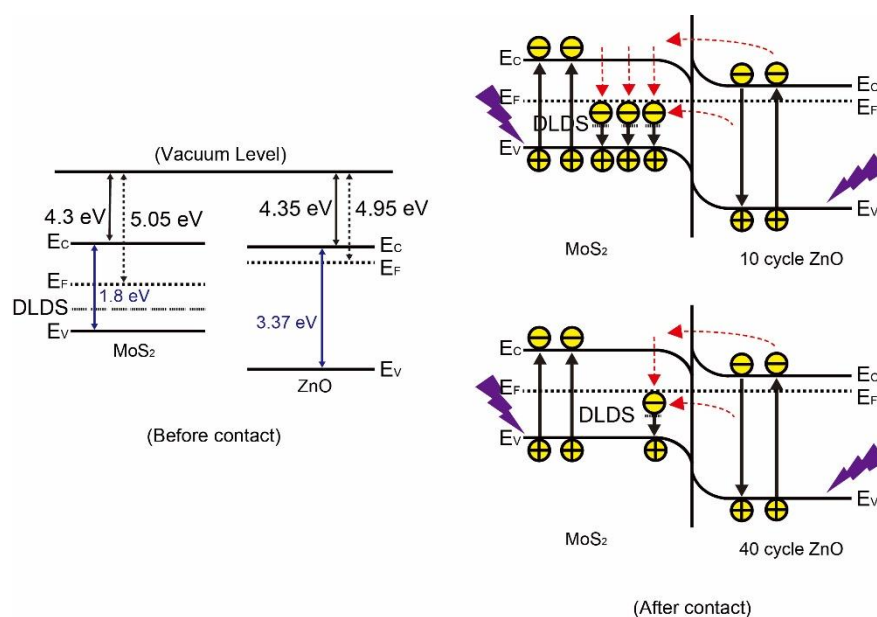

**Fig. S5.** Energy band diagram of photodetector based on MoS<sub>2</sub>-ZnO hybrid structures.<sup>S1-S4</sup>

[RefS1.] Chen, L., Xue, F., Li, X., Huang, X., Wang, L., Kou, J., & Wang, Z. L. (2015). Strain-gated field effect transistor of a MoS<sub>2</sub>-ZnO 2D-1D hybrid structure. *ACS nano*, 10(1), 1546-1551.

[RefS2.] Kang, K. M., & Park, H. H. (2017). Effect of Atomic Layer Deposition Temperature on the Growth Orientation, Morphology, and Electrical, Optical, and Band-Structural Properties of ZnO and Fluorine-Doped ZnO Thin Films. *The Journal of Physical Chemistry C*, 122(1), 377-385.

[RefS3.] Nazir, G. et al. (2017). Enhanced photoresponse of ZnO quantum dot-decorated MoS<sub>2</sub> thin films. *RSC Advances*, 7(27), 16890-16900.

[RefS4.] Park, J. H. et al (2017). Defect passivation of transition metal dichalcogenides via a charge transfer van der Waals interface. *Science advances*, 3(10), e1701661.

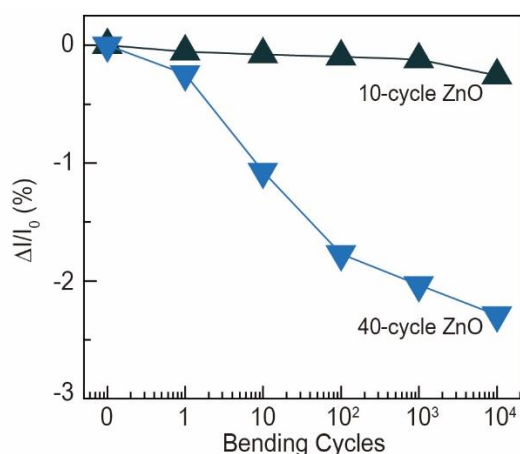

**Fig. S6.** The variation of electrical properties of as-deposited ZnO depending on the bending cycles.

**Table S1.** Rise and decay time for photodetectors based on MoS<sub>2</sub>-ZnO hybrid structure

|                | MoS <sub>2</sub> | 10 cycle ZnO | 20 cycle ZnO | 30 cycle ZnO | 40 cycle ZnO |
|----------------|------------------|--------------|--------------|--------------|--------------|
| Rise time (s)  | 76.11            | 72.92        | 58.85        | 25.63        | 13.96        |
| Decay time (s) | -                | -            | -            | 246.71       | 55.33        |

**Table S2.** Performance comparison of MoS<sub>2</sub>-based ultraviolet photodetectors

| Material                       | Method                                                                 | Wavelength (nm) | Bias voltage (V)          | Responsivity | Reference |
|--------------------------------|------------------------------------------------------------------------|-----------------|---------------------------|--------------|-----------|
| Pt nanostrips-MoS <sub>2</sub> | Mechanical exfoliation method (MoS <sub>2</sub> ), Pt nanostrips (FIB) | 325             | 4 V                       | 14 A/W       | [Ref.S5]  |
| Single layer MoS <sub>2</sub>  | Mechanical exfoliation method                                          | 550             | 1 V (gate voltage ~ 50 V) | 7.5 mA/W     | [Ref.S6]  |
| Multilayer MoS <sub>2</sub>    | Mechanical exfoliation method                                          | 455             | 1 V (gate voltage ~ -3 V) | ~ 80 mA/W    | [Ref.S7]  |
| Single layer MoS <sub>2</sub>  | CVD method                                                             | ~400            | 1 V                       | ~1 mA/W      | [Ref.S8]  |
| ZnO-MoS <sub>2</sub>           | Solution (MoS <sub>2</sub> ), ZnO (ALD)                                | 254             | 40V                       | 2.7 A/W      | This work |

[Ref.S5] Kumar, R., Sharma, A., Kaur, M., & Husale, S. (2017). Pt-Nanostrip-Enabled Plasmonically Enhanced Broad Spectral Photodetection in Bilayer MoS<sub>2</sub>. *Advanced Optical Materials*, 5(9), 1700009.

[Ref.S6] Yin, Z., Li, H., Li, H., Jiang, L., Shi, Y., Sun, Y., ... & Zhang, H. (2011). Single-layer MoS<sub>2</sub> phototransistors. *ACS nano*, 6(1), 74-80.

[Ref.S7] Choi, W., Cho, M. Y., Konar, A., Lee, J. H., Cha, G. B., Hong, S. C., ... & Kim, S. (2012). High-detectivity multilayer MoS<sub>2</sub> phototransistors with spectral response from ultraviolet to infrared. *Advanced materials*, 24(43), 5832-5836.

[Ref.S8] Yore, A. E., Smithe, K. K., Jha, S., Ray, K., Pop, E., & Newaz, A. K. M. (2017). Large array fabrication of high performance monolayer MoS<sub>2</sub> photodetectors. *Applied Physics Letters*, 111(4), 043110.
